# Supplementary material for: Identification and Assessment of Potential Microplastic Emissions within the Lake Tollense Catchment Area, Mecklenburg-Western Pomerania, Germany
Source: MDPI journal article supplement (doi:10.3390/su152015048), 2023-10-19
Supplement: s1 [file s1]

## Supplementary Materials

### Identification and assessment of potential microplastic emissions within the Lake Tollense catchment area, Mecklenburg Western-Pomerania, Germany

Elke K. Fischer<sup>‡\*</sup>, Tilmann Gahrau<sup>‡</sup>, Matthias Tamminga<sup>‡</sup>

<sup>‡</sup>Center for Earth System Research and Sustainability, Working Group Microplastic Research at CEN, University of Hamburg, Bundesstrasse 55, 20146 Hamburg, Germany  
elke.fischer@uni-hamburg.de

**Table S1.** Land-use types coverage in comparison: Study area of Lake Tollense catchment and Germany according to total area (km<sup>2</sup>) and percentage of coverage (%)

|                   | Study area (Lake Tollense catchment) |                 | Germany |                 |
|-------------------|--------------------------------------|-----------------|---------|-----------------|
|                   | %                                    | km <sup>2</sup> | %       | km <sup>2</sup> |
| Agricultural area | 64.0                                 | 335.14          | 50.8    | 181,625         |
| Forest area       | 25.3                                 | 132.51          | 29.8    | 106,546         |
| Water bodies      | 6.1                                  | 31.88           | 13.9    | 49,819          |
| Urban area        | 3.2                                  | 16.96           | 3.2     | 11,390          |
| Other land        | 1.4                                  | 7.21            | 2.3     | 8,202           |
|                   | 100.0                                | 523.70          | 100     | 357,582         |

**Table S2.** Areas covered according to land-use types (in km<sup>2</sup> and percentage of coverage of the total catchment)

| Corine<br>land<br>cover | land-use type                     | total |                 |
|-------------------------|-----------------------------------|-------|-----------------|
|                         |                                   | %     | km <sup>2</sup> |
| 211                     | Non-irrigated arable land         | 53.18 | 278.52          |
| 311                     | Broad-leaved forest               | 15.42 | 80.75           |
| 231                     | Pastures                          | 10.74 | 56.26           |
| 312                     | Coniferous forest                 | 8.85  | 46.36           |
| 512                     | Water bodies                      | 6.09  | 31.88           |
| 112                     | Discontinuous urban fabric        | 2.22  | 11.60           |
| 313                     | Mixed forest                      | 1.03  | 5.40            |
| 322                     | Moors and heathland               | 0.55  | 2.89            |
| 142                     | Sport and leisure facilities      | 0.53  | 2.78            |
| 121                     | Industrial or commercial units    | 0.46  | 2.43            |
| 324                     | Transitional woodland-shrub       | 0.39  | 2.02            |
| 131                     | Mineral extraction sites          | 0.25  | 1.29            |
| 411                     | Inland marshes                    | 0.19  | 1.00            |
| 222                     | Fruit trees and berry plantations | 0.07  | 0.36            |
| 141                     | Green urban areas                 | 0.03  | 0.15            |
| total                   |                                   | 100%  | 523.7           |

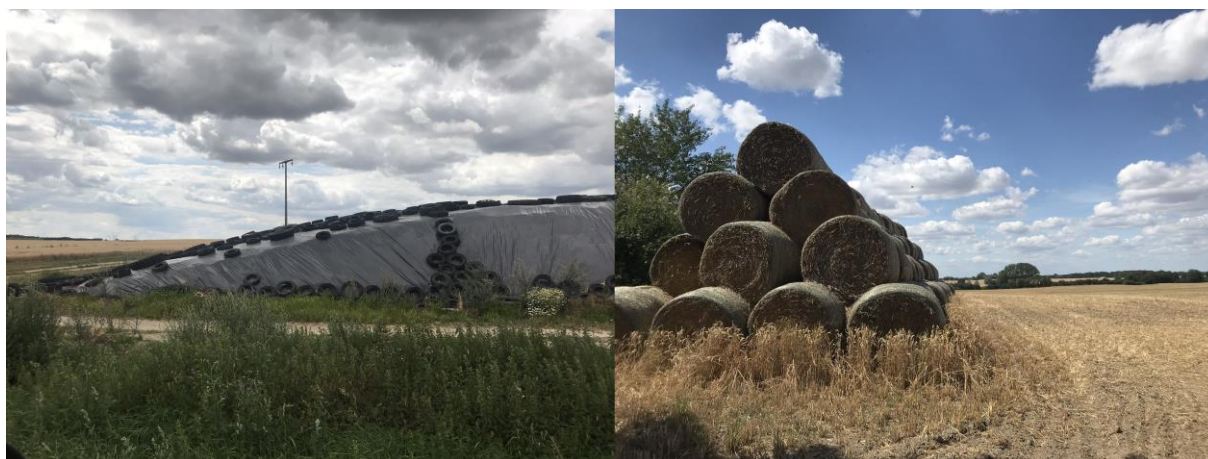

**Figure. S1** Drive-in fodder silo with PE film and rubber tires, near Woldegk and hay bales made of PE nets, near Wulkenzin.

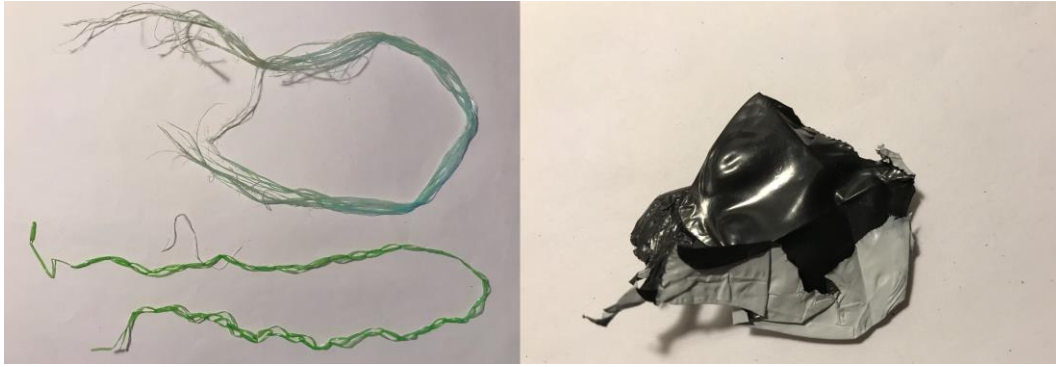

**Figure S2** Left: Polyethylene from the net covering hay bales, near Wulkenzin. Right: Polyethylene from the cover film of a drive-in silo, near Woldegk.

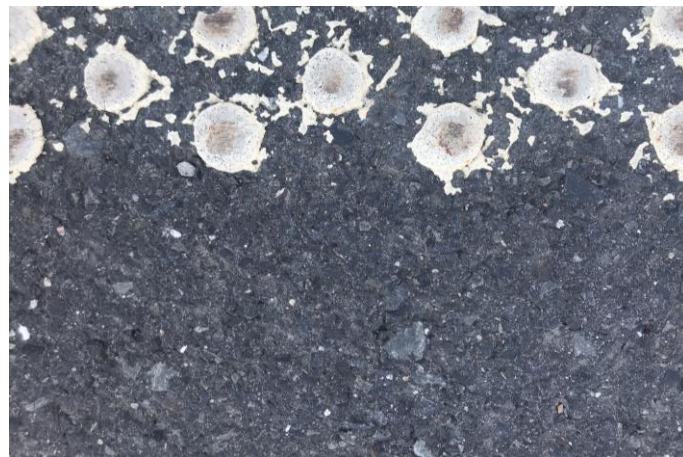

**Figure S3** Stone Mastic Asphalt with road markings, near Wulkenzin.

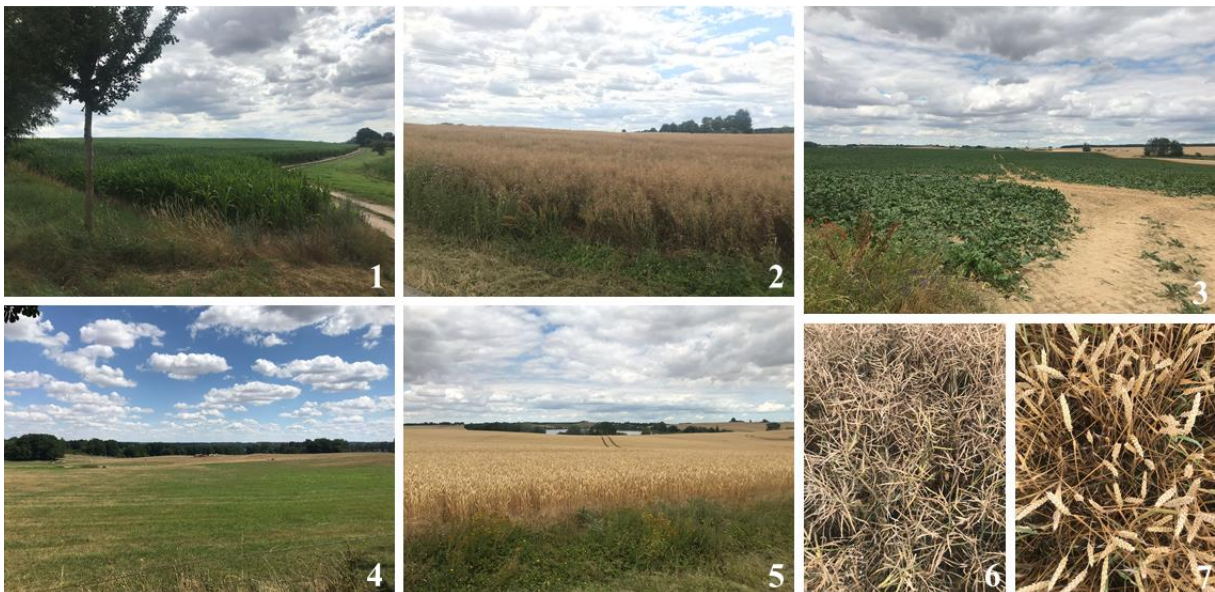

**Figure S4** Agricultural land-use in the catchment. 1: Maize (*Zea mays*) near the Rehberger See, 2: Rape (*Brassica napus*) in the Lindetal, 3: Sugar beet (*Beta vulgaris*) near Woldegk, 4: Forage meadows near Penzlin, 5: Wheat (*Triticum*) in the Lindetal. 6: Rape (*Brassica napus*) near Ballin, 7: Wheat (*Triticum*) near Ballin.

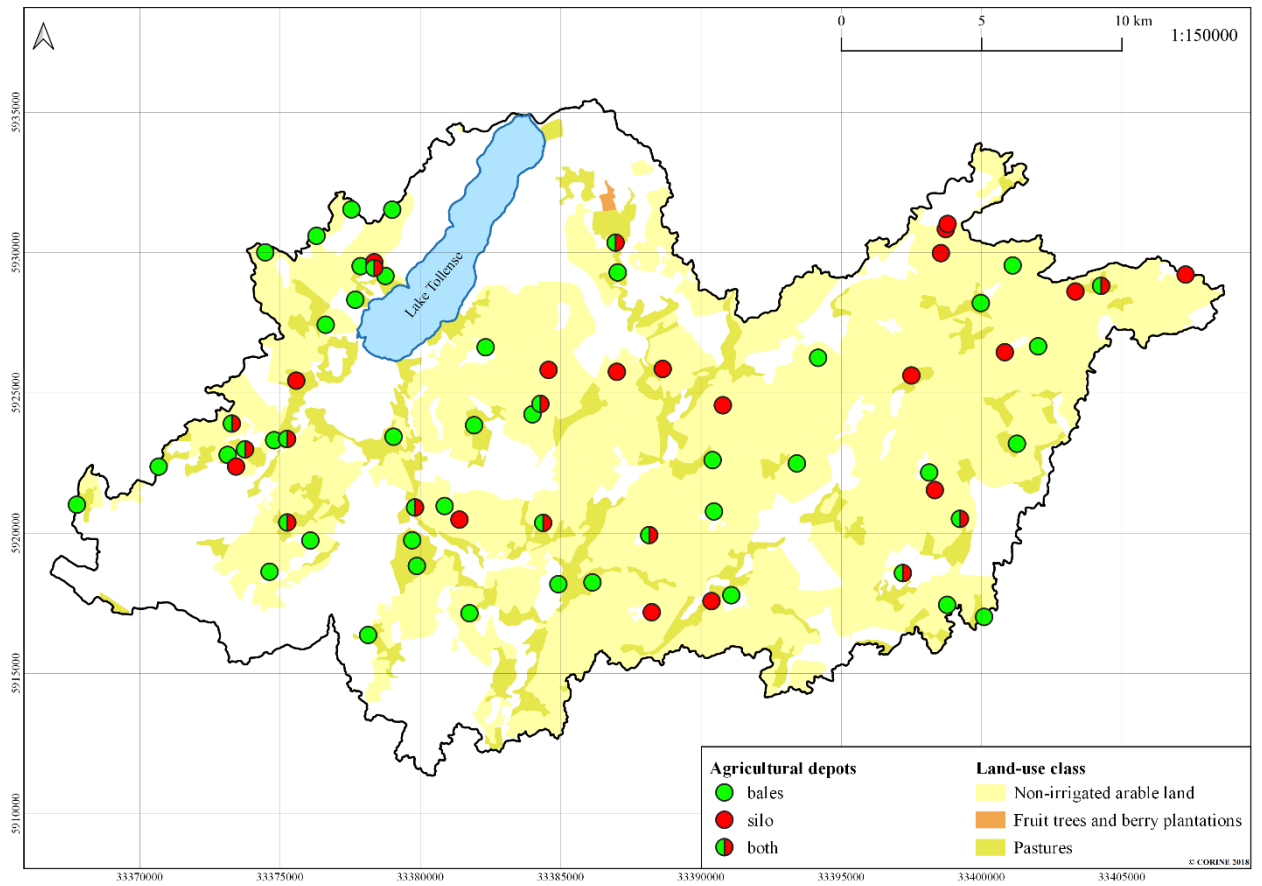

**Figure S5.** Remote sensing agricultural depots. (Projection: ETRS89/UTM zone 33N. Source: Copernicus Land Monitoring Service 2018)

**Table S3.** Calculation of the population density within the catchment area of Lake Tollense according to municipalities.

| municipality              | area.mun<br>km <sup>2</sup> | share.catch<br>km <sup>2</sup> | pop.mun | avg. pop.<br>density p/km <sup>2</sup> | est. pop. in<br>catchment |
|---------------------------|-----------------------------|--------------------------------|---------|----------------------------------------|---------------------------|
| Blankensee                | 56.14                       | 55.21                          | 1,635   | 29                                     | 1,601                     |
| Blumenholz                | 41.84                       | 41.51                          | 784     | 19                                     | 789                       |
| Burg Stargard, Stadt      | 76.61                       | 67.3                           | 5,402   | 71                                     | 4,778                     |
| Cölpin                    | 21.24                       | 7.12                           | 743     | 35                                     | 249                       |
| Carpin                    | 64.11                       | 27.72                          | 874     | 14                                     | 388                       |
| Feldberger Seenlandschaft | 201.09                      | 23.35                          | 4,433   | 22                                     | 514                       |
| Grünow                    | 23.22                       | 0.64                           | 299     | 13                                     | 8                         |
| Groß Nemerow              | 21.02                       | 21.02                          | 1,160   | 55                                     | 1,156                     |
| Hohenzieritz              | 20.54                       | 19.29                          | 444     | 22                                     | 424                       |
| Holldorf                  | 15.67                       | 15.67                          | 773     | 49                                     | 768                       |
| Klein Vielen              | 45.64                       | 13.03                          | 621     | 14                                     | 182                       |
| Kubblank                  | 13.49                       | 0.02                           | 168     | 12                                     | 0                         |
| Kuckssee                  | 19.19                       | 1.36                           | 542     | 28                                     | 38                        |
| Lindetal                  | 56.33                       | 48.68                          | 1,133   | 20                                     | 974                       |
| Möllenbeck                | 36.32                       | 34.67                          | 697     | 19                                     | 659                       |
| Neetzka                   | 13.57                       | 3.92                           | 225     | 17                                     | 67                        |
| Neubrandenburg, Stadt     | 86.11                       | 22.73                          | 64,086  | 748                                    | 17,002                    |
| Neustrelitz, Stadt        | 139.89                      | 8.47                           | 20,140  | 146                                    | 1,236                     |
| Penzlin, Stadt            | 115.56                      | 18.07                          | 4,159   | 36                                     | 651                       |
| Woldegk, Stadt            | 164.16                      | 66.82                          | 4,392   | 33                                     | 2,205                     |
| Wulkenzin                 | 21.59                       | 9.33                           | 1,561   | 72                                     | 671                       |
| sum / avg                 | 1,253                       | 523.7                          | 5,441   | 70                                     | 34,361                    |



Table S4. Results of the land-use analysis, by sub-catchment, sector and Corine Land Cover classes (clc), with highlighted values

| clc land-use type                     | Lake Tollense |              | Lake Tollense e. |              | Lake Tollense w. |              | Lieps        |              | Linde        |               | Nonnenbach   |               | total        |               |
|---------------------------------------|---------------|--------------|------------------|--------------|------------------|--------------|--------------|--------------|--------------|---------------|--------------|---------------|--------------|---------------|
|                                       | %             | km²          | %                | km²          | %                | km²          | %            | km²          | %            | km²           | %            | km²           | %            | km²           |
| <b>Agricultural area</b>              | <b>0.59</b>   | <b>0.10</b>  | <b>39.82</b>     | <b>10.44</b> | <b>56.11</b>     | <b>15.35</b> | <b>40.01</b> | <b>33.98</b> | <b>78.94</b> | <b>117.10</b> | <b>72.19</b> | <b>158.16</b> | <b>63.99</b> | <b>335.14</b> |
| 211 Non-irrigated arable land         | 0.01          | 0.00         | 30.49            | 7.99         | 46.94            | 12.84        | 28.29        | 24.03        | 69.01        | 102.38        | 59.92        | 131.27        | 53.18        | 278.52        |
| 222 Fruit trees and berry plantations | -             | -            | 0.0007           | 0.0002       | -                | -            | -            | -            | 0.24         | 0.36          | -            | -             | 0.07         | 0.36          |
| 231 Pastures                          | 0.58          | 0.10         | 9.34             | 2.45         | 9.17             | 2.51         | 11.72        | 9.95         | 9.68         | 14.36         | 12.27        | 26.89         | 10.74        | 56.26         |
| <b>Forest area</b>                    | <b>0.60</b>   | <b>0.11</b>  | <b>36.14</b>     | <b>9.48</b>  | <b>41.21</b>     | <b>11.27</b> | <b>47.69</b> | <b>40.50</b> | <b>14.63</b> | <b>21.70</b>  | <b>22.57</b> | <b>49.45</b>  | <b>25.30</b> | <b>132.51</b> |
| 311 Broad-leaved forest               | 0.56          | 0.10         | 32.58            | 8.54         | 33.10            | 9.05         | 21.96        | 18.65        | 11.53        | 17.10         | 12.46        | 27.30         | 15.42        | 80.75         |
| 312 Coniferous forest                 | 0.03          | 0.01         | -                | -            | 6.94             | 1.90         | 24.82        | 21.08        | 1.98         | 2.94          | 9.33         | 20.43         | 8.85         | 46.36         |
| 313 Mixed forest                      | 0.01          | 0.00         | 3.57             | 0.94         | 1.17             | 0.32         | 0.90         | 0.76         | 1.12         | 1.66          | 0.78         | 1.72          | 1.03         | 5.40          |
| <b>Water bodies</b>                   | <b>98.75</b>  | <b>17.54</b> | <b>0.22</b>      | <b>0.06</b>  | <b>1.46</b>      | <b>0.40</b>  | <b>6.08</b>  | <b>5.16</b>  | <b>1.12</b>  | <b>1.67</b>   | <b>3.21</b>  | <b>7.04</b>   | <b>6.09</b>  | <b>31.88</b>  |
| 512 Water                             | 98.75         | 17.54        | 0.22             | 0.06         | 1.46             | 0.40         | 6.08         | 5.16         | 1.12         | 1.67          | 3.21         | 7.04          | 6.09         | 31.88         |
| <b>Urban area</b>                     | <b>0.06</b>   | <b>0.01</b>  | <b>21.73</b>     | <b>5.70</b>  | <b>1.22</b>      | <b>0.33</b>  | <b>0.76</b>  | <b>0.64</b>  | <b>4.81</b>  | <b>7.14</b>   | <b>1.43</b>  | <b>3.14</b>   | <b>3.24</b>  | <b>16.96</b>  |
| 112 Discontinuous urban fabric        | 0.02          | 0.00         | 11.58            | 3.04         | 1.19             | 0.33         | 0.76         | 0.64         | 3.32         | 4.93          | 1.21         | 2.66          | 2.22         | 11.60         |
| 121 Industrial or commercial units    | -             | -            | 6.72             | 1.76         | -                | -            | -            | -            | 0.45         | 0.67          | -            | -             | 0.46         | 2.43          |
| 141 Green urban areas                 | -             | -            | -                | -            | -                | -            | -            | -            | 0.10         | 0.15          | -            | -             | 0.03         | 0.15          |
| 142 Sport and leisure facilities      | 0.04          | 0.01         | 3.44             | 0.90         | 0.03             | 0.01         | -            | -            | 0.93         | 1.38          | 0.22         | 0.48          | 0.53         | 2.78          |
| <b>Other area</b>                     | <b>0.00</b>   | <b>0.00</b>  | <b>2.08</b>      | <b>0.54</b>  | <b>0.00</b>      | <b>0.00</b>  | <b>5.47</b>  | <b>4.64</b>  | <b>0.50</b>  | <b>0.74</b>   | <b>0.59</b>  | <b>1.28</b>   | <b>1.38</b>  | <b>7.21</b>   |
| 322 Moors and heathland               | -             | -            | -                | -            | -                | -            | 3.41         | 2.89         | -            | -             | -            | -             | 0.55         | 2.89          |
| 324 Transitional woodland-shrub       | -             | -            | 2.08             | 0.54         | -                | -            | 1.06         | 0.90         | 0.20         | 0.30          | 0.13         | 0.28          | 0.39         | 2.02          |
| 411 Inland marshes                    | -             | -            | -                | -            | -                | -            | -            | -            | -            | -             | 0.46         | 1.00          | 0.19         | 1.00          |
| 131 Mineral extraction sites          | -             | -            | -                | -            | -                | -            | 1.01         | 0.85         | 0.30         | 0.44          | -            | -             | 0.25         | 1.29          |

Table S5a Lieps: Tire, clutch, brake and wearing course abrasion (PM<sub>10</sub>)

| Lieps       |     |    |          |         |          |        |                            |                            |
|-------------|-----|----|----------|---------|----------|--------|----------------------------|----------------------------|
| roadname    | km  | ID | PKW/24 h | SV/24 h | PKW/a    | SV/a   | PKW PM <sub>10</sub> (g/a) | LKW PM <sub>10</sub> (g/a) |
| B104        | -   | -  | -        | -       | -        | -      | -                          | -                          |
| B104        | -   | -  | -        | -       | -        | -      | -                          | -                          |
| B193        | 4.6 | 12 | 4,451    | 465     | 1,624,61 | 169,72 | 245,851                    | 1,393,156                  |
| B198        | -   | -  | -        | -       | -        | -      | -                          | -                          |
| B198        | -   | -  | -        | -       | -        | -      | -                          | -                          |
| B96 (north) | 9.4 | 69 | 8,663    | 691     | 3,161,99 | 252,21 | 978,702                    | 5,545,980                  |
| B96 (south) | -   | -  | -        | -       | -        | -      | -                          | -                          |
| L281        | -   | -  | -        | -       | -        | -      | -                          | -                          |
| L33 (east)  | -   | -  | -        | -       | -        | -      | -                          | -                          |
| L33 (west)  | -   | -  | -        | -       | -        | -      | -                          | -                          |
| L331        | -   | -  | -        | -       | -        | -      | -                          | -                          |
| L34 (west)  | 6.0 | 12 | 1,082    | 89      | 394,930  | 32,485 | 78,795                     | 446,503                    |
| L34 (east)  | 3.0 | 15 | 642      | 33      | 234,330  | 12,045 | 22,894                     | 129,732                    |
| L34 (mid)   | -   | -  | -        | -       | -        | -      | -                          | -                          |
| sum / avg   | 23. | -  | 3,710    | 320     | 1,353,96 | 116,61 | 1,326,242                  | 7,515,371                  |

Total

8.84 t/a



Table S5d Lake Tollense east: Tire, clutch, brake and wearing course abrasion (PM<sub>10</sub>)

| Lake Tollense east |      |       |         |        |           |         |                            |                            |
|--------------------|------|-------|---------|--------|-----------|---------|----------------------------|----------------------------|
| roadname           | km   | ID    | PKW/24h | SV/24h | PKW/a     | SV/a    | PKW PM <sub>10</sub> (g/a) | LKW PM <sub>10</sub> (g/a) |
| B104 (north)       | -    | -     | -       | -      | -         | -       | -                          | -                          |
| B104 (south)       | -    | -     | -       | -      | -         | -       | -                          | -                          |
| B193               | -    | -     | -       | -      | -         | -       | -                          | -                          |
| B198 (north)       | -    | -     | -       | -      | -         | -       | -                          | -                          |
| B198 (south)       | -    | -     | -       | -      | -         | -       | -                          | -                          |
| B96 (north)        | 5.0  | edit. | 9,580   | 588    | 3,496,700 | 214,620 | 577,559                    | 200,880                    |
| B96 (south)        | 5.9  | 149   | 9,580   | 588    | 3,496,700 | 214,620 | 675,443                    | 234,924                    |
| L281               | -    | -     | -       | -      | -         | -       | -                          | -                          |
| L33 (east)         | 1.3  | -     | 3,532   | 142    | 1,289,180 | 51,830  | 56,816                     | 12,944                     |
| L33 (west)         | -    | -     | -       | -      | -         | -       | -                          | -                          |
| L331               | -    | -     | -       | -      | -         | -       | -                          | -                          |
| L34 (west)         | -    | -     | -       | -      | -         | -       | -                          | -                          |
| L34 (east)         | -    | -     | -       | -      | -         | -       | -                          | -                          |
| L34 (mid)          | -    | -     | -       | -      | -         | -       | -                          | -                          |
| sum / avg          | 12.2 | -     | 7,564   | 439    | 2,760,860 | 160,357 | 1,309,818                  | 448,748                    |

**Total** 1.76 t/a

**Table S6.** Summary on tire, clutch, brake and wearing course abrasion (PM<sub>10</sub>) per sub-catchment (refer to table SI.3a-d for a detailed breakdown (note: in the sub-catchment of Lake Tollense west there is no presence of federal or state roads))

| sub-catchment      | km (sum) | LV/24h (avg) | HV/24h (avg) | LV/a (avg) | HV/a (avg) | LV PM <sub>10</sub> (g/a) (sum) | HV PM <sub>10</sub> (g/a) (sum) |
|--------------------|----------|--------------|--------------|------------|------------|---------------------------------|---------------------------------|
| Lieps              | 23.0     | 3,710        | 320          | 1,353,968  | 116,618    | 1,326,242                       | 7,515,371                       |
| Linde              | 36.1     | 2,506        | 220          | 914,690    | 80,404     | 1,167,250                       | 495,742                         |
| Nonnenbach         | 49.8     | 2,906        | 233          | 1,060,690  | 85,201     | 1,505,343                       | 749,898                         |
| Lake Tollense east | 12.2     | 7,564        | 439          | 2,760,860  | 160,357    | 1,309,818                       | 448,748                         |
| total              | 121.1    | 3,337        | 303          | 1,316,747  | 110,645    | 5,308,652                       | 9,209,759                       |

**Total** 9.21 t/a

LV (light vehicle – passenger car), HV (heavy vehicle – trucks)
